# Supplementary material for: The contribution of intermolecular forces to phototropic actuation of liquid crystalline elastomers
Source: Royal Society of Chemistry journal article supplement (doi:10.1039/d1py00028d), 2021-01-01
Supplement: d1py00028d1.pdf [file d1py00028d1.pdf]

## Supporting Information

# The contribution of intermolecular forces to phototropic actuation of liquid crystalline elastomers

Taylor S. Hebner,<sup>a</sup> Christopher N. Bowman<sup>a,b</sup> and Timothy J. White <sup>\*a,b</sup>

- a. Department of Chemical and Biological Engineering, University of Colorado Boulder.  
b. Materials Science and Engineering Program, University of Colorado Boulder.

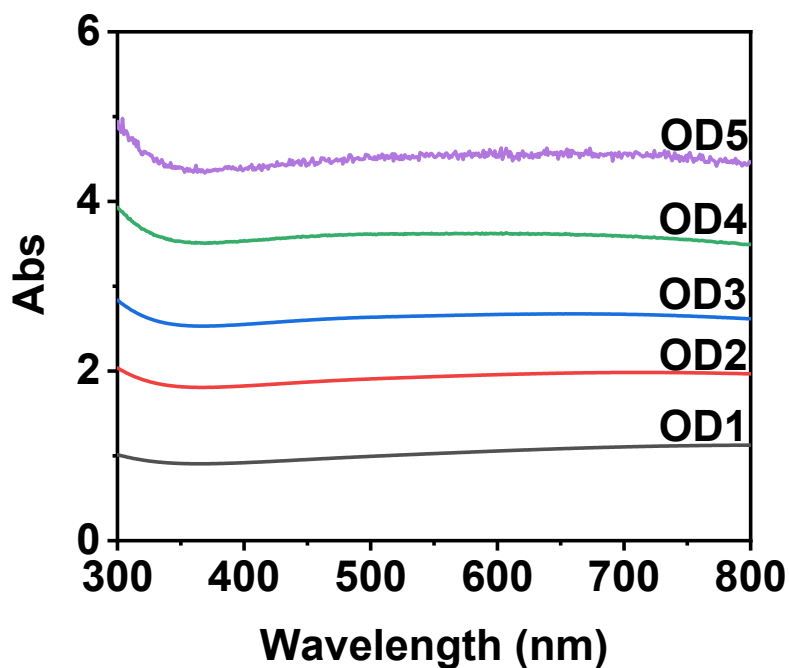

Fig. S1 UV-Vis curves for neutral density metallic filter set.

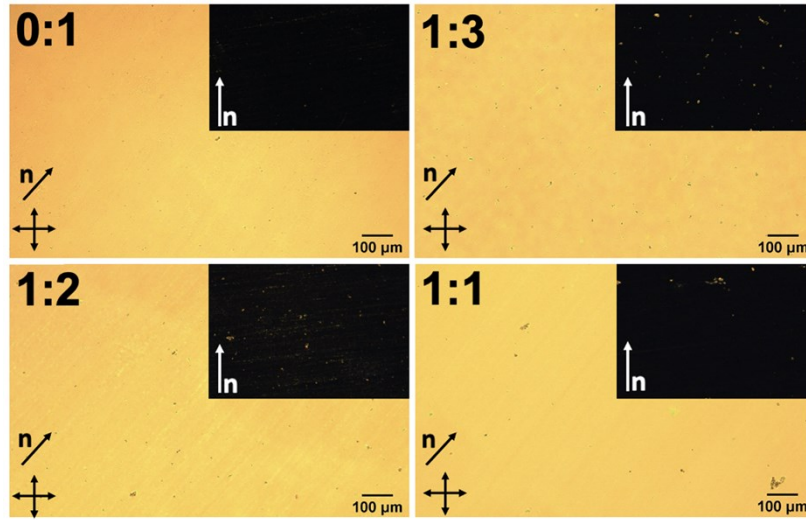

**Fig. S2** Images taken under a polarized optical microscope with nematic director  $45^\circ$  and  $0^\circ$  (inset) in relation to crossed polarizers.

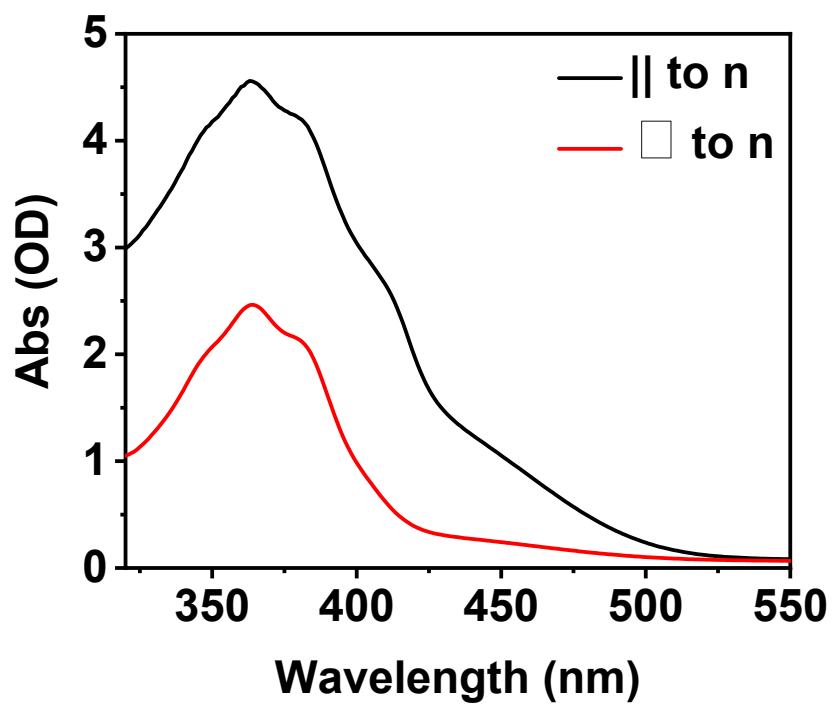

**Fig. S3** Polarized UV-Vis curves ( $0^\circ$  and  $90^\circ$  to nematic director) of monodomain azobenzene-functionalized LCEs used to calculate dichroic ratios to obtain order parameters.

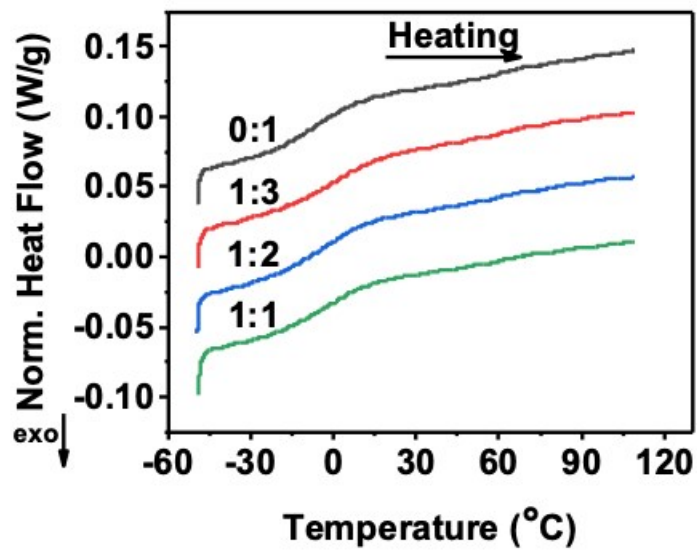

Fig. S4 DSC thermograms for azobenzene-functionalized LCE.

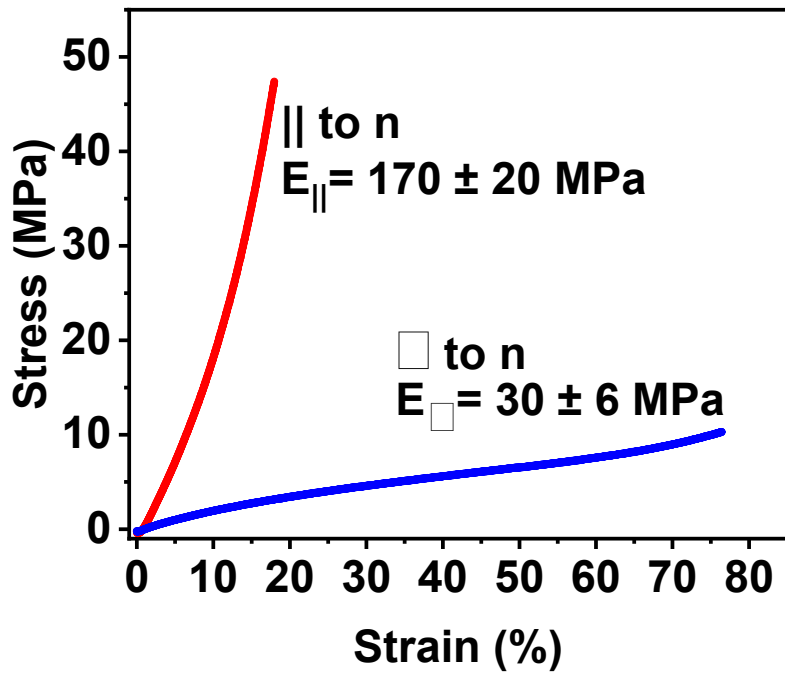

Fig. S5 Representative tensile curves for monodomain azobenzene-functionalized LCE films tested parallel and perpendicular to the nematic director.

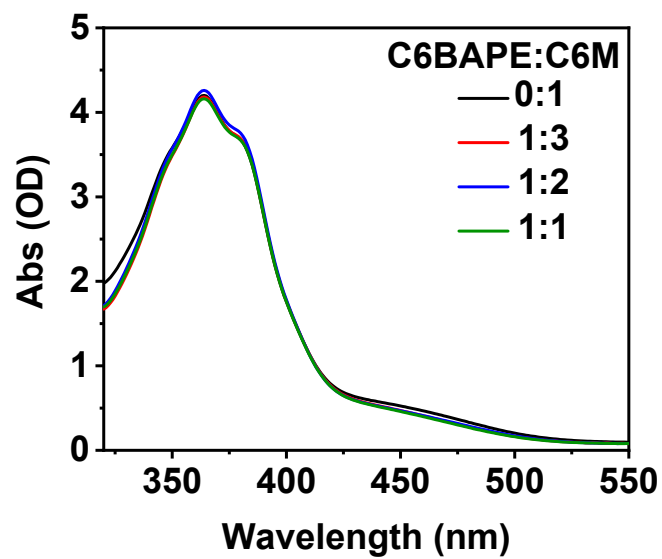

**Fig. S6 (a)** Unpolarized UV-Vis spectra for azobenzene-functionalized LCE.

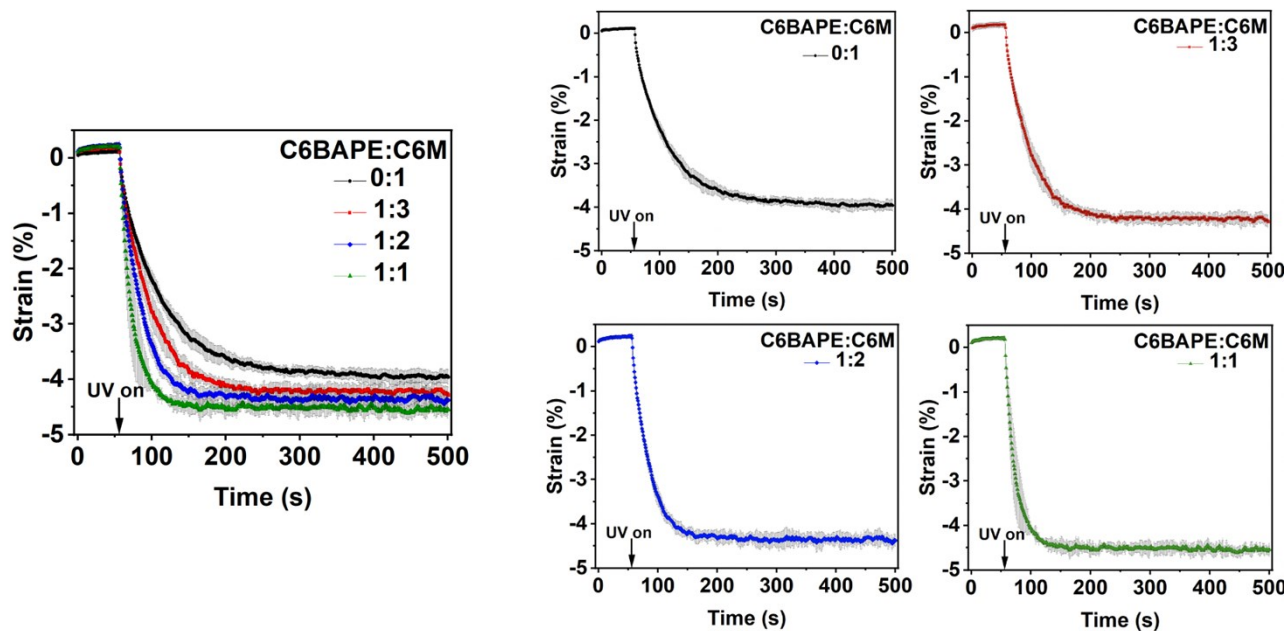

**Fig. S7** Photomechanical strain generated by azobenzene-functionalized LCEs with calculated error. (Constant stress 0.001 N , preload force 0.001N, 50 mW/cm<sup>2</sup> 365 nm light exposure at 60 s)

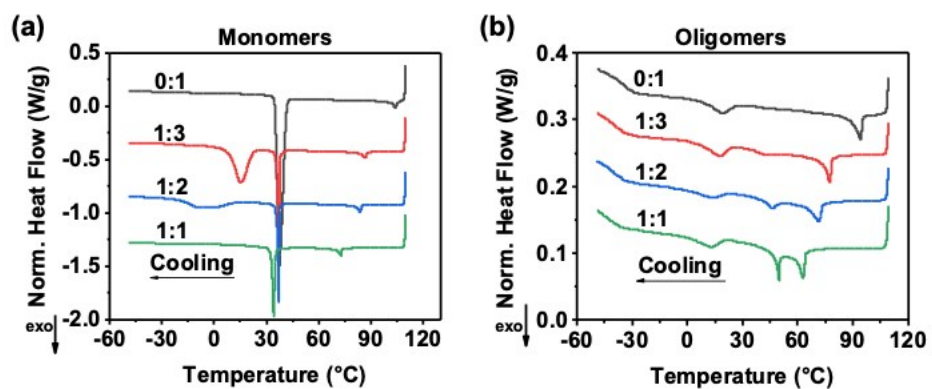

**Fig. S8.** Full DSC thermograms of (a) monomer mixtures and (b) oligomers used to prepare monodomain azobenzene-functionalized LCEs.



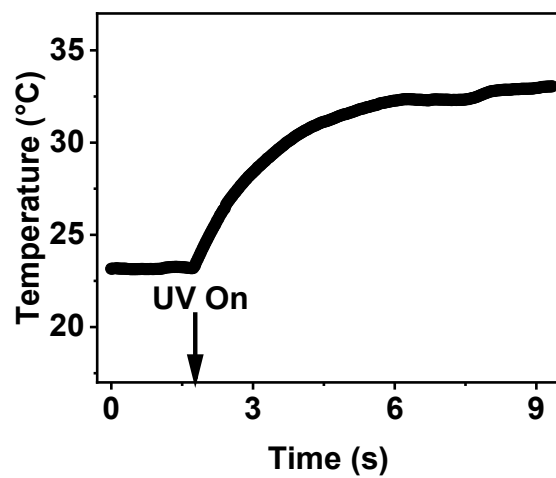

**Figure S9.** Temperature increase of azo-LCE due to photothermal effects upon initial exposure. Temperature measured using thermal data in Video S1.

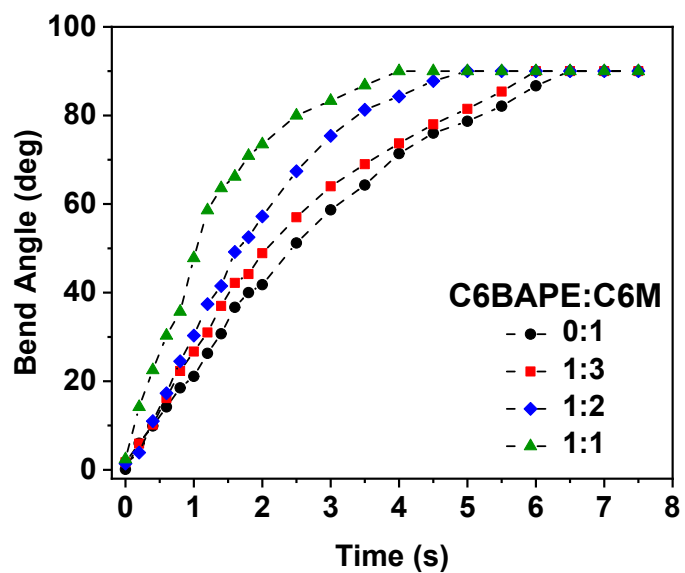

**Figure S10.** Angle of deformation for azo-LCE as a function of UV light exposure. Angles measured from Video S2 using tip displacement angle between the mounting point of the cantilever and tip of the cantilever
